# Supplementary material for: Activin A/BMP2 chimera AB235 drives efficient redifferentiation of long term cultured autologous chondrocytes
Source: PubMed Central journal article supplement (PMC4643338; doi:10.1038/srep16400), 2015-11-13
Supplement: srep16400-s1.pdf [file srep16400-s1.pdf]

1 **Activin A/BMP2 chimera AB235 drives efficient redifferentiation of long term**  
2 **cultured autologous chondrocytes**

3

4 G. Jiménez, E. López-Ruiz, W. Kwiatkowski, E. Montañez, F. Arrebola, E. Carrillo,  
5 P.C. Gray, J.C. Izpisua Belmonte, S. Choe, M. Perán, J. A. Marchal.

6

7

8 ***Material and Methods***

9 ***RNA isolation and real time-PCR analysis***

10 Total cellular RNA was isolated using TriReagent (Sigma) and reverse transcribed  
11 using the Reverse Transcription System kit (Promega). Real-time PCR was performed  
12 using the SYBR-Green PCR Master mix (Promega) according to the manufacturer's  
13 recommendations. PCR reactions were performed as follows: an initial denaturation at  
14 95°C for 2 min, 40 cycles of 95°C for 5 s and 60°C for 30 s, and final cycle of  
15 dissociation of 60 – 95 °C. The gene expression levels were normalized to  
16 corresponding GAPDH values and are shown as fold change relative to the value of the  
17 control sample. All the samples were done in triplicate for each gene.

18 ***Histological analysis***

19 Cartilage tissue and cell pellets were immersed in 4% paraformaldehyde in 0.1 M  
20 phosphate buffered saline (PBS) for 4 hours at 4°C, washed in 0.1M PBS and embedded  
21 in paraffin in an automatic tissue processor (TP1020, Leica, Germany). The paraffin  
22 blocks were cut into 4 µm sections for staining. Alsin blue and Toluidine blue reveal

23 the presence of glycosaminoglycans (blue and purple respectively), and Masson-  
24 trichrome shows the existence of collagens (green).

### 25 ***Immunohistochemical analysis***

26 Fixed section and monolayer were blocked for 1 hour at room temperature (RT) with  
27 5% BSA, 5% foetal bovine serum in PBS and then incubated with Col I (SC25974, St.  
28 Cruz), Col X (ab49945, Abcam); Col II (SC52658, St. Cruz) and Sox 9 (AB5535,  
29 Millipore) overnight at 4°C. The next day, samples were washed thrice with PBS and  
30 incubated with the secondary antibodies (St. Cruz) for 1 hour at RT and finally, were  
31 washed thrice with PBS and mounted with mounting medium with DAPI.

32

### 33 ***Quantitative image analysis***

34 Quantitative image analysis was performed using ImageJ software (v1.43, NIH). Area,  
35 integrated density and mean staining were measured, along with several adjacent  
36 background readings. The relative staining was calculated using  $\text{relative staining} = \frac{\text{integrated density} - (\text{selected area} \times \text{mean staining of background readings})^{1,2}}$ . All the samples were done in  
37 triplicate, different sections of the pellets were analysed.

39

### 40 ***Chondrogenic differentiation in cell pellet culture***

41 Chondrocytes were cultured during 6-7 passages to achieve full differentiation.  
42 200.000 cells/ml of differentiated chondrocytes were plated into a well of six well plate.  
43 Control cells were grown in incomplete chondrogenic medium (DMEM–high glucose  
44 supplemented with 10% foetal bovine serum, 50 µg/µL of l-ascorbic acid 2-phosphate,

45 1% penicillin-streptomycin and 1% ITS. Treated cells were cultured in incomplete  
46 chondrogenic medium supplemented with 10 ng/ml of AB235. Media was change every  
47 other day and fresh AB235 was added to treated pellet during each medium change.  
48 After two weeks in culture, control and treated monolayer cells were manually  
49 separated using a sterile scraped, transferred to 15 ml conical tubes and centrifuged at  
50 300 g at 21 °C for 7 minutes to form a cell pellet. Control and treated pellets were  
51 incubated for four weeks, medium was changed every other day and fresh AB235 was  
52 added to treated pellet during each medium change.

53

#### 54 *In vivo assay*

55 Animals were maintained in a microventilated cage system with a 12-h light/dark cycle  
56 with food and water ad libitum. Mice (n=6) were manipulated in a laminar air-flow to  
57 keep on the specific pathogen-free conditions. Cells were grown on pellet system as  
58 described before<sup>8</sup>, and after 6 weeks 2 AB235 pellets and 2 control pellets were  
59 obtained from each of the 3 different patients. 2 pellets (AB235 and control) of the same  
60 patient were implanted into the back subcutaneous tissue of anesthetized mice (n=2),  
61 one on each side of the midline. Four weeks later, the mice were sacrificed via an  
62 overdose injection of anaesthetic, and the pellet with the new tissue formed around it  
63 were excised for further histologic analysis. Animal welfare and experimental  
64 procedures were carried out in accordance with institutional and international standards.

65

66

67 **Table S1.** Patient data and evaluation of the conditions of the knee according the  
 68 Ahlback scale value and the Knee Society Knee Scoring System (KSS)

69

| Patient | Sex (M/F) | Age (Years) | Ahlback | KSS |
|---------|-----------|-------------|---------|-----|
| 1       | M         | 66          | III     | 30  |
| 2       | F         | 74          | III     | 28  |
| 3       | M         | 67          | II      | 32  |
| 4       | M         | 74          | III     | 25  |
| 5       | M         | 59          | III     | 37  |
| 6       | F         | 70          | III     | 29  |
| 7       | F         | 68          | III     | 30  |
| 8       | F         | 57          | II      | 35  |

70

71

72

73

74 **Table S2.** Sequences of the primers used in the RT-PCR reactions

| Gene        | Forward                | Reverse                  |
|-------------|------------------------|--------------------------|
| Collagen I  | ATGGATGAGGAAACTGGCAACT | GCCATCGACAAGAACAGTGTAAGT |
| Collagen II | GAGACAGCATGACGCCGAG    | GCGGATGCTCTCAATCTGGT     |
| Collagen X  | GCC CAC TAC CCA ACA C  | TGG TTT CCC TAC AGC TGA  |
| Sox 9       | ACTCCGAGACGTGGACATC    | TGTAGGTGACCTGGCCGTG      |
| GADPH       | TGCACCACCAACTGCTTAGC   | GGCATGGACTGTGGTCATGAG    |

75

76

77

78 **Table S3.** Composition of the Foetal Bovine Serum used in this study. Provided by  
 79 Technical Application Scientist II. Life Sciences Solutions. Thermo Fisher Scientific

80

| Biochemical Component    | Units   | Fetal Bovine Serum |             |
|--------------------------|---------|--------------------|-------------|
|                          |         | mean               | (range)     |
| Total Protein            | g/dl    | 4,2                | 4.0 - 4.3   |
| pH                       | units   | 7,3                | 6.7 - 7.3   |
| Osmolality               | mosm/kg | 314                | 290 - 335   |
| Glucose                  | mg/dl   | 130                | 107 - 144   |
| Hemoglobin               | mg/dl   | 14,2               | 5.8 - 23.0  |
| Bilirubin                | mg/dl   | 0,2                | 0.1 - 0.4   |
| Uric Acid                | mg/dl   | 3,2                | 2.6 - 3.5   |
| Urea Nitrogen            | mg/dl   | 14,4               | 15 - 18     |
| Creatinine               | mg/dl   | 3,1                | 2.8 - 3.3   |
| Sodium                   | meq/L   | 134                | 131 - 137   |
| Potassium                | meq/L   | 15,1               | 12.9 - 14.2 |
| Calcium (total)          | mg/dl   | 14,6               | 14.3 - 15.0 |
| Chloride                 | meq/L   | 104,9              | 102 - 108   |
| Phosphorus (inorganic)   | mg/dl   | 11,2               | 10.0 - 14.0 |
| Iron (total)             | ug/dl   | 195                | 189 - 204   |
| Albumin                  | g/dl    | 2,6                | 1.3 - 2.9   |
| Globulin (total)         | g/dl    | 1,3                | 1.1- 1.5    |
| Alkaline Phosphatase     | U/L     | 262                | 2 - 319     |
| GG-Transpeptidase        | U/L     | 5.0                | 0 - 7.0     |
| SGOT                     | U/L     | 60.4               | 28 - 161    |
| Lactate Dehydrogenase    | U/L     | 559                | 262 - 1010  |
| Cholesterol              | mg/dl   | 34.2               | 19 - 54     |
| Low Density Lipoprotein  | mg/dl   | 2.8                | 0 - 7.0     |
| High Density Lipoprotein | mg/dl   | 6.5                | 5.0 - 9.0   |
| Triglycerides            | mg/dl   | 219.5              | 73- 1720    |
| Growth Hormone           | ng/ml   | 131                | 126 - 138   |
| Insulin                  | uIU/ml  | 4.3                | 2.9 - 5.5   |
| Estradiol                | pg/ml   | 13.8               | 11.2 - 17.5 |
| Progesterone             | ng/ml   | 0.03               | 0.01 - 0.06 |
| Testosterone             | ng/ml   | 0.40               | 0.38 - 0.45 |
| T4 (Thyroxine)           | ug/dl   | 14.8               | 13.9 - 15.8 |
| T3                       | ng/ml   | 1.2                | 0.9 - 1.4   |

81

82

83

84

85

86 **Supplementary References**

87 1. Jensen, E.C. Quantitative analysis of histological staining and fluorescence using ImageJ.  
88 *Anat Rec.* **296(3)**, 378-381 (2013).

89

90 2. McCloy, R.A. *et al.* Partial inhibition of Cdk1 in G2 phase overrides the SAC and  
91 decouples mitotic events. *Cell Cycle.* **13(9)**, 1400-1412 (2014).

92

93

94
